# Supplementary material
Source: PubMed Central journal article supplement (PMC3761627)
Supplement: 1306699110_pnas.201306699SI.pdf [file 1306699110_pnas.201306699SI.pdf]

# Supporting Information

Zhao et al. 10.1073/pnas.1306699110

## SI Text

**Analysis of FRET Efficiencies Reflected in Measured FRET Ratios.** In the presence of a given fluorescence resonance energy transfer (FRET) efficiency  $F$  excitation of CFP produces a fluorescence intensity  $I_C$  in the CFP channel:

$$I_C = f_{CC} \cdot S \cdot (1 - F). \quad [S1]$$

The constant factor  $f_{CC}$  includes CFP excitation efficiency, the emission efficiency of CFP in the CFP detection band, and the light collection efficiency in this band.  $S$  is the density of SNARE Complex Reporter (SCORE) in the membrane.

The fluorescence intensity in the YFP (Venus) channel  $I_Y$  is the sum of three contributions (1):

i) CFP emission in the YFP channel:

$$I_{CY} = f_{CY} \cdot S \cdot (1 - F). \quad [S2]$$

The factor  $f_{CY}$  includes CFP excitation efficiency, the emission efficiency of CFP in the YFP detection band, and the light collection efficiency in this band.

ii) YFP emission in the YFP channel due to FRET:

$$I_Y = f_{YY,FRET} \cdot S \cdot F. \quad [S3]$$

The factor  $f_{YY,FRET}$  includes CFP excitation efficiency, the emission efficiency of YFP in the YFP detection band, and the light collection efficiency in this band.

iii) YFP emission in the YFP channel due to direct excitation of YFP with 436-nm light:

$$I_Y = f_{YY,DIRECT} \cdot S. \quad [S4]$$

The factor  $f_{YY,DIRECT}$  includes YFP excitation efficiency, the emission efficiency of YFP in the YFP detection band, and the light collection efficiency in this band.

The measured intensity ratio  $R$  can thus be expressed as

$$R = \frac{I_Y}{I_C} = \frac{f_{CY}}{f_{CC}} + \frac{f_{YY,DIRECT}}{f_{CC}} + \left( \frac{f_{YY,FRET}}{f_{CC}} + \frac{f_{YY,DIRECT}}{f_{CC}} \right) \cdot \frac{F}{1 - F}. \quad [S5]$$

The ratio  $f_{CY}/f_{CC}$  was measured in cells expressing CFP-tagged SNAP25 to be 0.42. The ratio  $f_{YY,DIRECT}/f_{CC}$  was estimated based on the spectroscopic properties of CFP and Venus and the transmission curves of the filters to be  $\sim 0.22$ .

Eq. S5 can be written in simplified form as

$$R = \frac{I_Y}{I_C} = A + B \cdot \frac{F}{1 - F} \quad [S6]$$

with the coefficient  $A = \frac{f_{CY}}{f_{CC}} + \frac{f_{YY,DIRECT}}{f_{CC}} \sim 0.64$ .

The coefficient  $B$  can be estimated based on an acceptor photobleaching experiment of SCORE expressed in live chromaffin cells (Fig. S3). SCORE was excited in total internal reflection (TIR) mode through a 436/10-nm excitation filter and a CFP/YFP dual-band beam splitter (51017bs; Chroma) instead of the 455-nm dichroic. The fluorescence image was separated into CFP and Venus components as in the other experiments. Images were acquired every 1 s with 200-ms exposure time.

Between exposures, excitation was switched to a 508/20-nm filter using a filter wheel and the TIR annulus switched out using a second filter wheel. The filter wheels were controlled through a Lambda 10-2 controller (Sutter Instrument Company) by the software of the EMCCD camera (iXon; Andor). The acceptor photobleaching led to a decrease in YFP fluorescence  $I_Y$  and a concomitant increase in CFP fluorescence intensity  $I_C$  (Fig. S3). Before acceptor photobleaching  $I_C$  was 15% lower than after, corresponding to an initial FRET efficiency of 0.15.

In the exocytosis measurements the mean baseline intensity ratio averaged over the cells' footprints was  $\sim 1.11$ . With the value  $F = 0.15$  the coefficient  $B$  is found to be 2.7.  $B$  is dominated by the ratio  $f_{YY,FRET}/f_{CC}$ , which reflects the ratio of brightness at 100% FRET from YFP only to that at 0% FRET from CFP only. This ratio was also estimated based on the spectroscopic properties of CFP and YFP and the filter transmission curves to be 2.5, in good agreement with the determination based on acceptor photobleaching.

Solving Eq. S6 for the FRET efficiency  $F$  yields

$$F = \frac{(R - A)}{(B + R - A)}. \quad [S7]$$

Eq. S7 can now be used to estimate the apparent FRET efficiencies. The baseline values at fusion sites ( $R = 1.14$ ) gives  $F = 0.158$  and the FRET efficiency during the transient FRET increase ( $R = 1.21$ ) is  $F = 0.176$ .

**Estimate of Fractions of Molecules Contributing to Observed FRET Changes.** The above estimates were based on the assumption that all molecules measured in a given region show the same FRET efficiency and that all molecules at the fusion site undergo the same change. This, however, is not the case given the specific differences at fusion sites and changes during fusion events. We therefore ask how the data may be interpreted based on the assumption that SCORE may exist in two distinct conformations that show two different FRET efficiencies. If we assume that a fraction  $\alpha$  of molecules exhibit high FRET efficiency ( $F_{high}$ ) whereas the remaining molecules show low FRET efficiency ( $F_{low}$ ), the intensities in the CFP and YFP channels become

$$I_C = (1 - \alpha) \cdot f_{CC} \cdot S \cdot (1 - F_{low}) + \alpha \cdot f_{CC} \cdot S \cdot (1 - F_{high}) \quad [S8]$$

$$I_Y = \frac{f_{CY}}{f_{CC}} \cdot I_C + f_{YY,DIRECT} \cdot S + (1 - \alpha) \cdot f_{YY,FRET} \cdot S \cdot F_{low} + \alpha \cdot f_{YY,FRET} \cdot S \cdot F_{high} \quad [S9]$$

and the fluorescence intensity ratio

$$R = \frac{I_Y}{I_C} = A + B \cdot \frac{F_{low} + \alpha \cdot (F_{high} - F_{low})}{1 - [F_{low} + \alpha \cdot (F_{high} - F_{low})]}. \quad [S10]$$

Comparing Eq. S10 to Eq. S6 reveals that the apparent FRET efficiencies in Eq. S6 correspond to the expression

$F_{app} = F_{low} + \alpha \cdot (F_{high} - F_{low})$  in Eq. S9 and  $\alpha$  can be calculated as

$$\alpha = \frac{F_{app} - F_{low}}{F_{high} - F_{low}}. \quad [S11]$$

In our experiments, overexpression of SCORE means that most of the SCORE will not be in a complex with syntaxin and



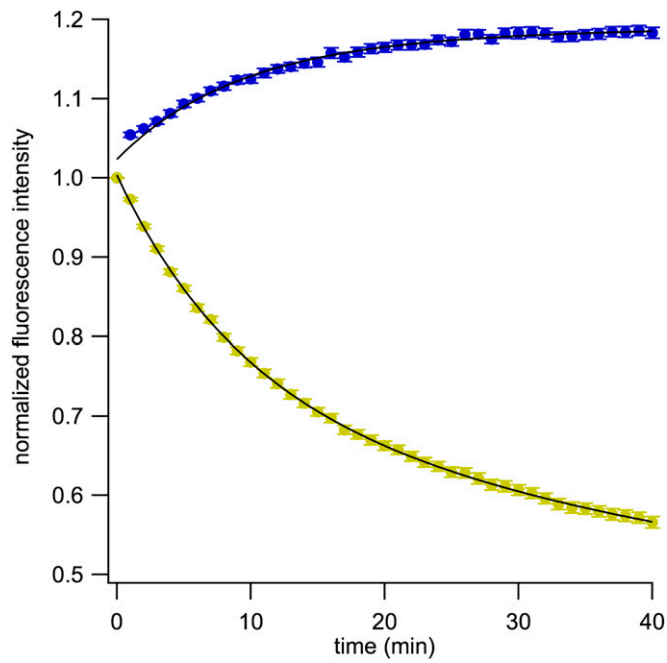

**Fig. S3.** Acceptor photobleaching of SCORE in live chromaffin cells leads to an increase of fluorescence intensity in the CFP channel (blue line) and a decrease in the YFP channel (yellow line). The continuous lines are double exponential fits to the respective intensity time courses. Normalized intensities were averaged from 19 experiments.

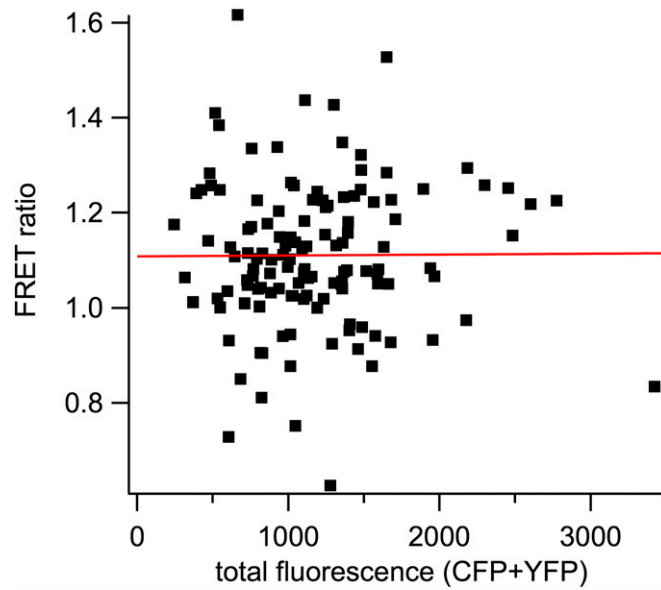

**Fig. S4.** FRET ratio in the footprint of individual cells plotted versus total fluorescence as a measure of expression level. Linear regression yielded a slope of  $0 \pm 3 \times 10^{-6}$ .
